# Supplementary material for: A Network Pharmacology Approach to Uncover the Pharmacological Mechanism of XuanHuSuo Powder on Osteoarthritis
Source: Evid Based Complement Alternat Med. 2016 Mar 24;2016:3246946. doi: 10.1155/2016/3246946 (PMC4823500; doi:10.1155/2016/3246946)
Supplement: Supplementary file 1 — Table S1 shows the composite compounds of each herb in XHSP. Table S2 shows the compound targets for each herb in XHSP. Table S3 shows the targets of osteoarthritis. Table S4 shows the enrichment analysis of compound target, OA target and compound target/OA target based on Gene Ontology (GO) annotation. Table S5 shows the topological features of major nodes in the compound target-OA target-other human proteins' PPI network. Table S6 shows enrichment analysis of compound target, OA target, compound target/OA target and other human protein based on Gene Ontology (GO) annotation. [file 3246946.f1.zip]

Archive with 7 entries (6 files):
- Supplementary Materials/
- Supplementary Materials/Table S1.xlsx
- Supplementary Materials/Table S2.xlsx
- Supplementary Materials/Table S3.xlsx
- Supplementary Materials/Table S4.xlsx
- Supplementary Materials/Table S5.xlsx
- Supplementary Materials/Table S6.xlsx
