# Supplementary material for: A Network Pharmacology Approach to Uncover the Pharmacological Mechanism of XuanHuSuo Powder on Osteoarthritis
Source: Evid Based Complement Alternat Med. 2016 Mar 24;2016:3246946. doi: 10.1155/2016/3246946 (PMC4823500; doi:10.1155/2016/3246946)
Supplement: Supplementary file 1 — Table S1 shows the composite compounds of each herb in XHSP. Table S2 shows the compound targets for each herb in XHSP. Table S3 shows the targets of osteoarthritis. Table S4 shows the enrichment analysis of compound target, OA target and compound target/OA target based on Gene Ontology (GO) annotation. Table S5 shows the topological features of major nodes in the compound target-OA target-other human proteins' PPI network. Table S6 shows enrichment analysis of compound target, OA target, compound target/OA target and other human protein based on Gene Ontology (GO) annotation. [file 3246946.f1.zip › Supplementary Materials/Table S1.xlsx]

## Sheet: Sheet1
Table S1 Composite compounds of each herb in XHSP
Herbs	Compounds
Psoralea corylifolia L. (Bu Gu Zhi)	Backuchiol
	Bakuchalcone
	Bavachalcone
	Bavachin
	Bavachinin
	Bavachromanol
	Bavachromene
	Bavacoumestan A
	Bavacoumestan B
	Corylidin
	Corylifolinin
	Corylin
	Corylinal
	Daucosterol
	Docosanoic acid
	Isobavachin
	Isocorylifonol
	Isoneobavachalcone
	Isopsoralen
	Isopsoralidin
	Myristic acid
	Neobavachalcone
	Neobavaisoflavone
	Psoralen
	Psoralenol
	Psoralidin
	Psoralidin-2',3'-oxide
	Sophoracoumestan A
	Stearic acid
	Stigmasterol
	Triacontane
	Xanthotoxin
Corydalis yanhusuo W.T.Wang (Yan Hu Suo)	Tetrahydroberberine
	N-Methyl laurotetanine
	(+)-Corybulbine
	1-methylcorypalline
	quercetin
	vanillic acid
	(S)-Scoulerine
	Sitogluside
	sitosterol
	Docosanoate
	Stigmasterol
	emodin
	Physcion
	oleic acid
	palmatine
	(13aR)-2,3,9,10-tetramethoxy-6,8,13,13a-tetrahydro-5H-isoquinolino[2,,1-b]isoquinoline
	Fumarine
	Isocorypalmine
	bicuculline
	Fagarine I
	C09367
	berberine
	columbamine
	coptisine
	Cryptopin
	Dihydrochelerythrine
	Dihydrosanguinarine
	sanguinarine
	10-nonacosanol
	Cavidine
	Noroxyhydrastinine
	(R)-Canadine
	Nantenin
	Hyndarin
	(-)-α-N-methylcanadine
	Capaurine
	caseanidine
	Clarkeanidine
	corybulbine
	CORYDALINE
	Corydalmine
	Corydine
	Corynoline
	Corynoloxine
	methyl-[2-(3,4,6,7-tetramethoxy-1-phenanthryl)ethyl]amine
	4H-Dibenzo(de,g)quinoline-1,11-diol, 5,6,6a,7-tetrahydro-2,10-dimethoxy-6-methyl-, (S)-
	dehydrocavidine
	Dehydrocorybulbine
	dehydrocorydaline
	Dehydrocorydalmine
	Dehydroglaucine
	Dehydronantenine
	demethylcorydalmatine
	13-methyldehydrocorydalmine
	(1S,8'R)-6,7-dimethoxy-2-methylspiro[3,4-dihydroisoquinoline-1,7'-6,8-dihydrocyclopenta[g][1,3]benzodioxole]-8'-ol
	Glauvent
	Streptomycin C
	isocorybulbine
	leonticine
	13-methylpalmatrubine
	Micheline B
	mecambridine
	N-methyllaurotetanine
	norglaucing
	Oxoglaucine
	Acetylcorynoline
	pontevedrine
	pseudocoptisine
	Pseudo protopine
	Sanguidimerine
	saulatine
	Spallidamine
	stylopine
	Tetrahydrocorysamine
	tetrahydroprotopapaverine
	N-(3,5-Dichloro-phenyl)-2-methyl-benzamide
	2,3,9,10-tetramethoxy-13-methyl-5,6-dihydroisoquinolino[2,1-b]isoquinolin-8-one
	yuanhunine
	Izoteolin
	lirioferine
	fumaric acid
	Norisocorydin
	Tetrahydrocoptisine
	reticulin
	isocorydine
	isocorypalmine(tetrahydroco-lumbanine)
	Corydalmine(kikemanine)
	corypalmine
Angelica sinensis (Oliv.) Diels (Dang Gui)	Senkyunolide A
	n-Butylidenephthalide
	D-Limonene
	β-Selinene
	Scopoletol
	palmitic acid
	Nonanal
	Cymol
	Decanal
	(-)-α-Pinene
	β-Chamigrene
	Myrcene
	Safrol
	p-Ocimene
	Moslene
	isoeugenol
	()-α-Terpineol
	o-Thymol
	succinic acid
	Sitogluside
	β-sitosterol
	D-Galacturonic acid, homopolymer
	FERULIC ACID (CIS)
	nicotinic acid
	Stigmasterol
	Eucarvone
	Farnesene
	(1S,4aR,8aR)-1-isopropyl-7-methyl-4-methylene-2,3,4a,5,6,8a-hexahydro-1H-naphthalene
	vanillin
	Dodekan
	bergamotene
	cuminal
	Loxanol V
	Tridecylene
	Verbenone
	Sebacic acid
	o-Acetyl-p-cresol
	Azelex
	(+)-Ledol
	Hypnon
	adenine
	()-Cuparene
	cis-Thujopsene
	3-Butylidene-7-hydroxyphthalide
	Levistolid A
	Allocymene
	senkyunolide-C
	senkyunolide-D
	senkyunolide-E
	4-Octanone
	(6R)-6-butylcyclohepta-1,4-diene
	cis-ligustilide
	Methylbutenol
	(4S)-1-methyl-4-(6-methylhepta-1,5-dien-2-yl)cyclohexene
	Guasol
	CADINENE
	Acoradiene
	Maruzen M
	o-cresol
	6,7,3',8'-diligustilide
	β-Terpinene
	Butal
	Ethol
	3,4-DIMETHYLBENZALDEHYDE
	ETHYLBENZALDEHYDE
	TMHYDROP
	bicycloelemene
	(1R,2S,4R)-1-ethyl-1-methyl-2,4-bis(1-methylethyl)cyclohexane
	DODECENE
	phosphatdic acid
	L-β,γ-Dimyristoyl-α-cephalin
	phosphatidylinositol
	phosphatidylinositol_qt
	o-Phthalic anhydride
	sedanolide
	senkyunolide
	sphingomyelin
	Isotetandrine
	α-acoradiene
	InChI=1/C15H24/c1-10-7-8-15-9-12(10)14(3,4)13(15)6-5-11(15)2/h7,11-13H,5-6,8-9H2,1-4H
	α-copaene
	(1R,4R,5S)-4-isopropenyl-1,8-dimethylspiro[4.5]dec-8-ene
	2,6-di(phenyl)thiopyran-4-thione
	o-Xylenol
	2,4,6-trimethyl-Octane
	Mesitaldehyde
	Isoxylaldehyde
	(E)-octadec-3-ene
	2-valerylbenzoic acid
	(Z)-2-Hexenyl hexanoate
	2-Methylhexadecanoic acid
	cis-Isoeugenol
	2-methyl-5-decanone
	2-methyldodecan-5-one
	3,7-dimethyl-nonane
	1,1,5-trimethyl-2-formylcyclohexa-2,5-diene-4-one
	4-Methyl-6-hepten-3-one
	6-Ethylresorcinol
	5-Indolol
	Undecanol-6
	7,10-PENTADECADIYNOIC ACID
	4-chloro-N-[1-methyl-5-[[1-methyl-5-[[1-methyl-5-(2-morpholinoethylcarbamoyl)pyrrol-3-yl]carbamoyl]pyrrol-3-yl]carbamoyl]pyrrol-3-yl]-5-[2-(2-pyridyl)ethylamino]isothiazole-3-carboxamide
	Amyl ketone
	Isoamylbenzene
	(Z)-2-[[(Z)-2-methylbut-2-enoyl]oxymethyl]but-2-enoic acid
	Tropone
	aromadendrene
	(3S)-3-butyl-3H-isobenzofuran-1-one
	()-Camphoric acid
	(3E)-3-butylidene-7-hydroxy-2-benzofuran-1-one
	Coniferyl ferulate
	lecithin
	2,4-Xylylaldehyde
	m-Ethylphenol
	1,5,5,6-tetramethyl-1,3-Cyclohexadiene
	dimethyl phthalate
	α-Cedrene
	β-Acoradiene
	β-Phellandrene
	γ-Acoradiene
	δ-Acoradiene
	Phenol
	Alloocimene
	Brefeldin A
	chuanxiong pathalide A
	Choline
	Stigmasterol-β-D-glucoside
	dimethyl sebacate
	tetracosanoicacid
	Uracil
	Azelaic Acid
	Dimethyl azelate
	Myristic acid
	lauryl alcohol
	vitamin A
	Vitamin B12
	angelicide
	Folinic acid
	folic acid
	Isoacroraene
	isocnidilide
	Dimethyl camphorate
	Camphene
Achyranthes bidentata Bl. (Niu Xi)	25S-Inokosterone
	Diisobutyl phthalate
	palmitic acid
	β-daucosterol
	β-daucosterol_qt
	quercetin
	Furol
	wogonin
	oleanolic acid
	caprylic acid
	succinic acid
	Sitogluside
	β-sitosterol
	D-Galacturonic acid, homopolymer
	rutin
	kaempferol
	βine
	Stigmasterol
	Astragalin
	hexanal
	1-hexanol
	Dibutyl phthalate
	2-heptanone
	(E)-oct-3-en-2-one
	5-Hydroxymethylfurfural
	psychedelic
	palmatine
	stearic acid
	Dekan
	hexadecane
	Heptadekan
	Henicosane
	(6R,10R)-6,10,14-trimethylpentadecan-2-one
	methyl palmitate
	Tricosane
	Dodekan
	tetradecane
	poriferasta-7,22E-dien-3β-ol
	octanol
	Azelex
	myristic acid
	Oktadekan
	berberine
	coptisine
	UPL
	oleanolic acid-3-O-β-D-glucuronopyranoside_qt
	Chrysophanol
	Tetracosane
	n-butyl-β-D-fructopyronoside
	hexanoic acid
	Chrysophanol-8-O-β-D-(6'-O-galloyl)-glucopyranoside
	(R)-Allantoin
	δ 7-stigmastenol
	baicalein
	Baicalin
	epiberberine
	Amylol
	pent-3-en-2-one
	Heptanol
	geniposide_qt
	pjs-1_qt
	Inophyllum E
	Spinasterol
	Hyperin
	(2R,3R,4S,5S,6R)-2-[[(3S,5S,9R,10S,13R,14R,17R)-17-[(E,2R,5S)-5-ethyl-6-methylhept-3-en-2-yl]-10,13-dimethyl-2,3,4,5,6,9,11,12,14,15,16,17-dodecahydro-1H-cyclopenta[a]phenanthren-3-yl]oxy]-6-(hydroxymethyl)oxane-3,4,5-triol
	heptanoic acid
	Nonenone
	ginsenoside Ro_qt
	ginsenoside Ro
	Areginal
	(2S,3S,4S,5R,6R)-6-[[(3S,4aR,6aR,6bS,8aS,12aS,14aR,14bR)-4,4,6a,6b,11,11,14b-heptamethyl-8a-[oxo-[[(2S,3R,4S,5S,6R)-3,4,5-trihydroxy-6-(hydroxymethyl)-2-tetrahydropyranyl]oxy]methyl]-1,2,3,4a,5,6,7,8,9,10,12,12a,14,14a-tetradecahydropicen-3-yl]oxy]-3,4-di
	2,6-Dimethylpiazine
	Amyl ketone
	Acetylfuran
	PRZ
	acetaldehyde
	chikusetsusaponin Ⅳa
	3-epioleanolic acid
	ginsenoside-Rg2_qt
	3-O-(β-D-glucopyranosiduronic acid) oleanolic acid
	(20r,22r)-2β,3β,20,22,26-pentahydroxy-cholestan-7,12-dien-6-one
	18-(β-D-Oxy glucose)-28-Oxo-12-oleanolic acid-3β-3-O-(β-D-glucose)-β-D-glucuronic acid methylester
	18-(β-D-Oxy glucose)-28-Oxo-12-oleanolic acid-3β-3-O-(β-D-glucose)-β-D-glucuronic acid methylester_qt
	oct-1-en-2-ol
	Inokosterone
	28-deglucosyl achyranthoside D methyl ester
	achyranthoside D trimethyl ester_qt
	28-deglucosyl-chikusetsusaponin,iva
	28-deglucosyl-chikusetsusaponin,iva_qt
	28-norolean-17-en-3-ol
	2-Octenal, 2-butyl-
	2β,3β,20α,22α,25-pentahydroxy cholesta-8,14-dien-6-one
	3-O-(β-D-glucose)-oleanolic acid-28-O-(β-D-glucose)
	(3S,4aR,6aR,6bS,8aS,12aS,14aR,14bR)-4,4,6a,6b,11,11,14b-heptamethyl-1,2,3,4a,5,6,7,8,9,10,12,12a,14,14a-tetradecahydropicene-3,8a-diol
	3-O-(β-D-glucuronic acid)-oleanolic acid-28-O-(β-D-glucose)
	3-O-β-D-glucopyranosyl-α-spinalsterol
	3-O-β-D-glucuronopyranoside-6-O-butyl ester
	3-O-β-D-glucuronopyranoside-6-O-methyl ester
	6-Dodecanone
	achybidensaponin,i
	achybidensaponin,i_qt
	achybidensaponin,ii
	achybidensaponin,ii_qt
	achyranthesterone A
	achyranthoside Ⅱ
	achyranthoside Ⅱ_qt
	achyranthoside Ⅲ
	achyranthoside Ⅳ
	achyranthoside A
	achyranthoside A_qt
	achyranthoside A trimethyl ester
	achyranthoside A trimethyl ester_qt
	achyranthoside c
	achyranthoside c_qt
	achyranthoside C butyl dimethyl ester
	achyranthoside C butyl dimethyl ester_qt
	achyranthoside C dimethyl ester
	achyranthoside C dimethyl ester_qt
	achyranthoside C trimethyl ester
	achyranthoside D
	achyranthoside D trimethyl ester
	achyranthoside E
	achyranthoside E_qt
	achyranthoside E butyl dimethyl ester
	achyranthoside E butyl dimethyl ester_qt
	achyranthoside E dimethyl ester
	achyranthoside E dimethyl ester_qt
	achyranthoside E trimethyl ester
	achyranthoside E trimethyl ester_qt
	achyranthoside I
	bidentatoside,i
	bidentatoside,i_qt
	bidentatoside,ii
	bidentatoside,ii_qt
	chikusetsusaponin Ⅳ
	Ginsenoside Rg2
	chikusetsusaponin IVA butyl ester
	Chikusetsusaponin IVa methyl ester
	Chikusetsusaponin V butyl ester
	Chikusetsusaponin V methyl ester
	deglucose chikusetsusaponin Iva
	deglucose chikusetsusaponin Iva_qt
	Ecdysterone-3-O-β-D-glucopyranoside
	Ecdysterone-3-O-β-D-glucopyranoside_qt
	geniposide
	hederagenin-28-O-β-D-glucopyranosyl ester
	hederagenin-28-O-β-D-glucopyranosyl ester_qt
	Monoglucuronide F
	niuxixinsterone A
	niuxixinsterone B
	niuxixinsterone C
	N-trans-feruloyl-3-methoxytyramine-4'-O-β-D-glucopyranoside
	N-trans-feruloyl-3-methoxytyramine-4-O-β-D-glucopyranoside
	oleanolic acid 3-O-[β-D-glucuronopyranoside-6-O-butyl ester]-28-O-β-D-glucopyranoside
	oleanolic acid 3-O-[β-D-glucuronopyranoside-6-O-ethyl ester]-28-O-β-D-glucopyranoside
	oleanolic acid 3-O-[β-D-glucuronopyranoside-6-O-methyl ester]-28-O-β-D-glucopyranoside
	oleanolic acid-3-O-β-D-(6'-butyl)-glucuronopyranoside
	oleanolic acid-3-O-β-D-glucuronopyranoside
	pjs-1
	Polypodine B
	quercetin-3-O-rutinoside
	rhapontisterone B
	rubrosterone
	Rubschisantherin
	Spinoside A
	stachysterone A
	stachysterone D
	zingibroside r1
	zingibroside r1_qt
	β-ecdysterone
	achyranthoside II
	ecdysterone
