# Supplementary material for: A Network Pharmacology Approach to Uncover the Pharmacological Mechanism of XuanHuSuo Powder on Osteoarthritis
Source: Evid Based Complement Alternat Med. 2016 Mar 24;2016:3246946. doi: 10.1155/2016/3246946 (PMC4823500; doi:10.1155/2016/3246946)
Supplement: Supplementary file 1 — Table S1 shows the composite compounds of each herb in XHSP. Table S2 shows the compound targets for each herb in XHSP. Table S3 shows the targets of osteoarthritis. Table S4 shows the enrichment analysis of compound target, OA target and compound target/OA target based on Gene Ontology (GO) annotation. Table S5 shows the topological features of major nodes in the compound target-OA target-other human proteins' PPI network. Table S6 shows enrichment analysis of compound target, OA target, compound target/OA target and other human protein based on Gene Ontology (GO) annotation. [file 3246946.f1.zip › Supplementary Materials/Table S2.xlsx]

## Sheet: Sheet1
Table S2 Compound targets for each herb in XHSP
Herbs	Compounds	Compounds Targets
Psoralea corylifolia L. (Bu Gu Zhi)	Isopsoralen	NFKB2
		CASP8
		CASP9
		CASP3
	Myristic acid	PVR
		TLR4
		ABL1
		GM2A
		INS
		HNF4A
		ALB
		LY96
		TRAPPC3
		PRKACA
		FABP2
		PPP3CA
		GUCA1A
		FKBP1A
		PPP3R1
		GCG
		ACOT7
		APOM
		GPR120
		ACOT4
		ACOT1
		PCSK1
		PPARG
		CALM2
		ACOT2
		ARF1
		PECI
		RCVRN
		MSRA
		PAEP
		ARF6
		PKIA
		NCOA1
		PRKACB
		CYP4Z1
		PPP3R2
		FKBP1C
		PPP3CB
		PPP3CC
		FKBP1B
		BET3L
		NCS1
		HPCAL1
		NCALD
	Psoralen	MAOB
		MAOA
		CYP2A6
	Stearic acid	FABP3
		ALB
		ACBD5
		ACOT7
		ADORA2A
		ACOT4
		ACBD4
		ACOT1
		ACOT2
		IGK@
		FABP4
		RORB
		PAEP
		PLA2G2D
		IGHM
		IGHV3-6
		IGHG3
		RORA
		IGHG1
		ENSG00000211894
		IGHG2
		IGHG4
	Stigmasterol	SLCO1B1
	Xanthotoxin	CYP2A6
		CYP1A2
		CYP1A1
		RAD52
		RAD51
		CYP3A4
		CYP2A13
		NR1I2
		HAL
		CYP2C9
		BHLHE40
Corydalis yanhusuo W.T.Wang (Yan Hu Suo)	N-Methyl laurotetanine	HTR1A
	quercetin	HCK
		PIM1
		HIBCH
		STK17B
		ATP5C1
		ATP5A1
		ATP5B
		NT5E
		CYP1B1
		CYP19A1
		DRD4
		ABCC1
		CYP1A1
		SLC16A7
		ALOX12
		SLC16A1
		ABCG2
		MMP9
		AKR1B1
		UGT3A1
		EGFR
		CYP2C8
		ABCC2
		PIK3CG
		SLCO2B1
		ABCB1
		CYP1A2
		AKR1C3
		UGT1A8
		UGT1A7
		UGT1A9
		UGT1A10
		SLC2A1
		GSTP1
		NFE2L2
		DIO2
		CHEK2
		EDN1
		ABCC4
		VEGFA
		JUN
		CHUK
		MCL1
		NR1I3
		PTGS2
		PARP1
		HIST3H3
		PTGS1
		STAT1
		MAPK8
		ACACA
		CTNNB1
		ESR2
		PTK2
		HIF1A
		CYP3A4
		NR1I2
		ABCC5
		CASP9
		TBK1
		BCL2
		GSK3B
		SLC2A2
		SULT1A1
		CASP3
		IL8
		CXCL10
		CKB
		CASP7
		CSF2
		BAX
		GLRA1
		AKT1
		TP53
		DIABLO
		RB1
		CDK2
		IL1B
		TYR
		MAPK3
		RPS6KA5
		CYP2C9
		IL6
		AHR
		APOB
		EIF2AK2
		SULT1E1
		CCL2
		PON1
		PLAT
		NFKBIA
		XBP1
		MAPK1
		SERPIND1
		SIRT1
		CFTR
		CA2
		CDK1
		ALOX5
		HSD17B2
		CA1
		CSNK2A1
		ERN1
		ERN2
		GLO1
		NOX4
		CA7
		CA14
		RNASEL
		CA6
	vanillic acid	UGT1A8
		UGT1A7
		UGT1A10
	Stigmasterol	SLCO1B1
	emodin	CSNK2A1
		ESR2
		TOP2A
		UGT1A8
		UGT1A7
		UGT1A9
		UGT1A10
		ATM
		ESR1
	oleic acid	FAAH
		GCG
		LPAR2
		GCGR
		NPS
		NMB
		GRK5
		ADRA1A
		AVP
		GRPR
		ADRA1D
		EDN1
		HTR2A
		GNB1
		NMS
		GNA14
		TBXA2R
		FAAH2
		FABP3
		HCRTR1
		TACR2
		CYSLTR1
		LPAR4
		EDN2
		OPN4
		PTGDS
		GPR120
		RBP4
		HCRTR2
		PTGFR
		LPAR3
		NTSR1
		SCD
		FABP7
		XCL2
		XCL1
		RGS18
		KISS1
		AVPR1B
		AGT
		GNRHR2
		NPSR1
		LPAR1
		GIP
		GM2A
		HRH1
		QRFP
		LPAR6
		UTS2D
		FPR2
		PLCB1
		LTB4R2
		EDN3
		CCK
		QRFPR
		ARHGEF25
		CCKBR
		EDNRB
		GNG2
		PLCB4
		RGS19
		PMCH
		GAST
		CHRM5
		GPR132
		OXTR
		UTS2R
		ACOT4
		FADS1
		F2R
		TAC1
		GPR4
		SCD5
		GLTP
		EDNRA
		ADRBK1
		ACOT1
		XCR1
		P2RY2
		TRHR
		P2RY6
		GPRC6A
		PCSK1
		NPFFR2
		FADS6
		BDKRB2
		LTB4R
		ADRA1B
		CHRM1
		NMUR1
		P2RY1
		PROKR1
		NTSR2
		TACR1
		TRH
		TACR3
		PTAFR
		SLC27A4
		TAC3
		AVPR1A
		F2RL1
		F2RL2
		CASR
		ALB
		FABP1
		PROK2
		CCKAR
		HCRT
		PTGER1
		GNAQ
		APP
		CYSLTR2
		MCHR2
		ACSL1
		PLCB3
		NPFFR1
		GNRH1
		HTR2C
		PIK3R1
		GC
		AGTR1
		GPR17
		PROK1
		GPR65
		NPFF
		MLN
		KNG1
		NMU
		PIK3CA
		GNA15
		PIK3R3
		SLC27A6
		PLCB2
		HTR2B
		NMBR
		ANXA1
		GRP
		NTS
		CHRM3
		NMUR2
		RARA
		SLC27A1
		MCHR1
		F2RL3
		FFAR1
		FFAR2
		GNRH2
		GHSR
		GPR68
		ACOT2
		TTR
		RGS2
		KISS1R
		GNRHR
		PIK3R2
		MLNR
		OXT
		PROKR2
		BDKRB1
		P2RY10
		GNA11
		UTS2
		RXRA
		FABP2
		PAEP
		PMP2
		ABCA1
		PARP1
		RB1
		PON1
		FABP4
		FABP5
	palmatine	CYP3A4
		ACHE
	bicuculline	CD86
		CD80
	C09367	DRD1
	berberine	TOP1
		ADRA2B
		CYP1A1
		PARP1
		CASP8
		CASP9
		CASP3
		ACHE
		AHR
		MMP2
		ADRA2C
		SIGMAR1
		HTR4
		CHRM1
		HTR2B
	Dihydrosanguinarine	S100B
		CASP9
		CASP3
	sanguinarine	CYP1A1
		MAPK8
		CASP8
		CASP9
		MAPK9
		CASP3
		MAPK3
		CYP1B1
		AHR
		MAPK1
	Nantenin	ADRA1A
	Hyndarin	SIGMAR1
		CASP3
	Glauvent	ABCB1
		DRD2
		DRD1
	Micheline B	CHRM3
	N-methyllaurotetanine	HTR1A
	lirioferine	CHRM3
	fumaric acid	ADSL
		FAH
		ME2
		SDHB
		FH
		SDHC
		ENSG00000232961
		SDHA
		MDH2
		MDH1
		PAICS
		SUCLG1
		SUCLA2
		SDHD
		GOT1
		ARG1
		ADSS
		ADSSL1
		SUCLG2
		ASL
		GOT1L1
		HIF1AN
		ARG2
		ASS1
		GOT2
		ATIC
		GSTZ1
		DRD3
		SLC6A2
		HCRTR1
		DRD2
		HTR7
		MAPK9
		IFNG
		ENOSF1
Angelica sinensis (Oliv.) Diels (Dang Gui)	D-Limonene	CYP2C19
	Scopoletol	UGT1A8
		UGT1A7
		UGT1A9
		UGT1A10
		UGT1A6
	palmitic acid	CES1
		FABP1
		FABP4
		CPT2
		PPT1
		HNF4G
		FABP3
		TRAPPC3
		CYP2C8
		SEC14L2
		FABP5
		ALB
		PMP2
		RHO
		PAEP
		FASN
		G14
		CPT1A
		RXRA
		TXNRD1
		ACADM
		TBL1XR1
		NCOA2
		NFYC
		GCG
		LPAR2
		GCGR
		CHD9
		NPS
		MED13
		NMB
		GRK5
		ARNTL
		ACOT7L
		CDK8
		ADRA1A
		AVP
		GRPR
		CYP1A1
		ADRA1D
		EDN1
		HTR2A
		GNB1
		ACBD7
		ACOT7
		NMS
		GNA14
		TBXA2R
		ABCA1
		MED12
		MED18
		HCRTR1
		TACR2
		CYSLTR1
		LPAR4
		EDN2
		ELOVL1
		OPN4
		NCOA3
		ANKRD1
		PTGDS
		GPR120
		HCRTR2
		PTGFR
		LPAR3
		NTSR1
		ME1
		HMGCS2
		PNLIP
		CCNC
		CDK19
		MED23
		APOA2
		CTGF
		XCL2
		XCL1
		RGS18
		KISS1
		AVPR1B
		G0S2
		AGT
		GNPAT
		TEAD1
		GNRHR2
		SREBF2
		WWTR1
		SIN3A
		TEAD4
		NPSR1
		TRAPPC4
		NCOA6
		LPAR1
		ACSL3
		GIP
		MED24
		NCOR2
		ACSL5
		HRH1
		FAR1
		UGT1A9
		TEAD3
		NFYA
		QRFP
		LPAR6
		MED22
		B2M
		UTS2D
		FPR2
		ACSL4
		NPAS2
		PLCB1
		HIF1A
		LTB4R2
		MED19
		EDN3
		CCK
		QRFPR
		ARHGEF25
		CCKBR
		EDNRB
		GNG2
		PLCB4
		RGS19
		PMCH
		GAST
		CHRM5
		PLB1
		TRAPPC6B
		SP1
		GPR132
		TIAM2
		MED25
		CARM1
		MED16
		GRHL1
		OXTR
		MED14
		UTS2R
		ACOT4
		FHL2
		HMGCS1
		FADS1
		F2R
		TAC1
		NCOA1
		LYPLA1
		GPR4
		EDNRA
		MED29
		ADRBK1
		ACOT1
		CYP4A11
		TEAD2
		XCR1
		P2RY2
		TRHR
		P2RY6
		GPRC6A
		ALAS1
		CLOCK
		CD36
		PCSK1
		NPFFR2
		BDKRB2
		LTB4R
		ADRA1B
		CHRM1
		NMUR1
		P2RY1
		ELOVL6
		PROKR1
		NTSR2
		TACR1
		TRH
		TACR3
		RGL1
		HDAC3
		PTAFR
		CYP7A1
		ANGPTL4
		MED1
		TAC3
		PEX11A
		AVPR1A
		NOS3
		MED30
		ACSL6
		TNFRSF21
		F2RL1
		F2RL2
		CASR
		PROK2
		CCKAR
		MED11
		HCRT
		LTC4S
		PTGER1
		MED27
		MED8
		LDLCQ3
		GNAQ
		MED7
		APP
		MED21
		YAP1
		CYSLTR2
		MED13L
		MCHR2
		ACSL1
		PLCB3
		NPFFR1
		PLIN2
		GNRH1
		HTR2C
		PIK3R1
		AGTR1
		GPR17
		PROK1
		NCOR1
		MED9
		SLC27A2
		GPR65
		NPFF
		GLIPR1
		MLN
		ABCB4
		MED20
		KNG1
		PPARGC1A
		NMU
		AGPS
		PIK3CA
		MED26
		EP300
		MED15
		GNA15
		PIK3R3
		PPARA
		CREBBP
		SMARCD3
		RORA
		PLCB2
		TGS1
		CLPS
		ACSBG1
		MED4
		HTR2B
		NMBR
		ANXA1
		GRP
		MED6
		NTS
		MED10
		CHRM3
		NMUR2
		PRIC285
		ACSBG2
		SLC27A1
		MED17
		MCHR1
		F2RL3
		FFAR1
		FFAR2
		GNRH2
		GHSR
		NFYB
		GPR68
		ACOT2
		APOA1
		RGS2
		KISS1R
		RBP2
		APOA5
		GNRHR
		MED31
		PIK3R2
		SULT2A1
		FDFT1
		MLNR
		TBL1X
		ACOT8
		OXT
		PROKR2
		TRIB3
		BDKRB1
		FAR2
		P2RY10
		GNA11
		UTS2
		TRAPPC6A
		FABP2
		TRBV2
		PTGS2
		TRAPPC1
		DBI
		LALBA
		ABCB1
		CD1D
		TRAPPC2
		TRAPPC5
		RELA
		MAPK8
		MAPK9
		UCP2
		TBC1D1
		MAPK14
		CD1A
		ENSG00000211789
		ENSG00000211785
		ENSG00000211794
		PTGS1
		RAB1A
		RAB1B
		CD1E
	Nonanal	AKR1B1
	Decanal	AKR1B1
		ALDH2
	Safrol	CYP1A2
		CYP3A4
		CASP9
		CASP3
		CYP2A6
		CYP2E1
	isoeugenol	LPO
		AKR1C2
		AHR
		CCL2
		EPX
		MPO
	o-Thymol	TRPA1
		CASP3
		TRPV3
	succinic acid	ALDH5A1
		HIF1AN
		EGLN1
		TMLHE
		BBOX1
		ALKBH2
		ALKBH3
		ENSG00000232961
		SDHA
		PPIA
		JMJD6
		KDM2A
		SUCLG1
		ASPH
		ISG15
		SUCLA2
		HIF3A
		KDM2B
		SDHD
		SDHB
		CUL2
		OGDHL
		OXCT2
		PLAU
		KDM4A
		SDHC
		FH
		GLT25D2
		BDH1
		FN1
		ALDH9A1
		VRK2
		HIF1A
		DLST
		P4HA3
		P4HB
		HACL1
		ACOT4
		SHMT1
		LEPREL1
		SLC13A2
		GAK
		GPR162
		F2
		SUCLG2
		EGLN2
		COL3A1
		COL1A2
		BDH2
		LEPRE1
		TCEB1
		PLOD2
		SLC13A3
		ABAT
		SLC27A2
		ACAT1
		EPAS1
		P4HA1
		PHYH
		DHTKD1
		ERP44
		TCEB2
		VHL
		GLT25D1
		EGLN3
		COL10A1
		COL1A1
		PLOD3
		OGDH
		RBX1
		DLD
		OXCT1
		PLOD1
		P4HA2
		PFKFB4
		PREP
		SERPINH1
		SUCNR1
		SLC25A10
		SLC22A8
		HSD17B6
		SLC13A1
		PRSS3
		PRSS1
		PAICS
		PPP2R4
		GBE1
		PREPL
	FERULIC ACID (CIS)	CYP1A1
		UGT1A8
		UGT1A7
		UGT1A10
		CYP1A2
		RB1
		TYR
		MAPK3
		MAPK1
		CA2
		CA1
	nicotinic acid	GPR109A
		NAPRT1
		ADCY5
		CHRM4
		RGS4
		OPRM1
		ADRA2B
		RGS14
		ADRA2C
		LPAR2
		RGS6
		CXCL1
		GPR55
		CCL25
		DRD3
		OXER1
		GNB1
		NMS
		P2RY4
		CNR2
		PPYR1
		AGTR2
		LPAR3
		HTR1B
		GNAI3
		NPBWR2
		ADORA3
		CNR1
		RGS10
		RXFP4
		RGS18
		RGS1
		AGT
		RGS7
		CXCL9
		DRD2
		NPY1R
		PNP
		CCL28
		PYY
		LPAR1
		CCL20
		S1PR3
		SSTR2
		CCR3
		PTGER3
		C5AR1
		GPR18
		GNAI1
		ADCY2
		HRH3
		FPR3
		FPR2
		CCR6
		NPY5R
		OPRL1
		GNG2
		RGS19
		GPR44
		NPB
		CCR4
		NPY2R
		CCR10
		PMCH
		NPBWR1
		SSTR3
		NPW
		GALR2
		RXFP3
		S1PR5
		CCR8
		PENK
		HTR1F
		S1PR2
		P2RY13
		CHRM2
		CXCR2
		HTR1A
		HTR1D
		GNAI2
		ADCY4
		ADCY6
		CCL19
		ADORA1
		P2RY14
		HTR1E
		BDKRB2
		P2RY12
		CXCL11
		NMUR1
		CXCL10
		APLN
		S1PR1
		CXCR6
		MTNR1A
		FPR1
		C3AR1
		PNOC
		GALR1
		GPER
		ADCY1
		RGS20
		CASR
		CCR1
		PPBP
		CXCL5
		CXCL3
		CXCR1
		ADCY9
		SSTR5
		CXCL16
		CCL16
		CCL5
		CCR5
		CXCR5
		HTR5A
		SST
		CXCL13
		ADCY8
		APP
		MCHR2
		ADRA2A
		CXCR7
		GPR17
		SSTR1
		GAL
		OPRK1
		KNG1
		POMC
		CXCL2
		NMU
		ADCY3
		CCL27
		CCL21
		ANXA1
		APLNR
		MTNR1B
		HRH4
		NMUR2
		SSTR4
		ADCY7
		GALR3
		MCHR1
		CCR7
		S1PR4
		C3
		NPY
		OPRD1
		CXCL6
		PPY
		C5
		PDYN
		BDKRB1
		DRD4
		HEBP1
		QPRT
		SLC16A3
		SLC16A1
		CYP2D6
		NNMT
		SLC5A8
		SLCO2B1
		SLC22A5
		PRKAA2
		LIPE
		DGAT2
		TF
		LTF
		MFI2
	Stigmasterol	SLCO1B1
	vanillin	UGT1A8
		UGT1A7
		UGT1A10
		CA2
		CA1
	Dodekan	TRBC1
		ENSG00000211784
		CD1D
		CD1C
		CD1B
		B2M
		CPT2
	Verbenone	CYP2B6
		CYP2A6
	Sebacic acid	HBB
		HBA2
	Azelex	TYR
		AKR1D1
		SRD5A2
		PPARG
	Hypnon	CYP3A4
	adenine	MTAP
		APRT
		PECR
		ADA
		ACACB
		ACP1
		STK24
		SLC29A3
		PNP
		SLC29A2
		ACVR2B
		SF3B1
		HSP90AA1
		ADAT3
		CHFR
		PNMT
		SF3B14
		PYGM
		MRI1
		SRPK2
		PRKCI
		UGT1A1
		PRKCZ
		ACACA
		MUTYH
		SRPK1
		SRPK3
	Guasol	CA2
		CA1
	Butal	AKR1B1
	Ethol	AGPS
		GNPAT
		FAR1
		FAR2
	sphingomyelin	SMPD4
		ASAH1
		NGF
		SGMS1
		SGMS2
		SMPD1
		ENPP7
		ABCA7
		SMPD2
		APOA1
		SMPD3
		CERK
		NGFR
		CAV1
	cis-Isoeugenol	LPO
		AKR1C2
		AHR
		CCL2
		EPX
		MPO
	5-Indolol	LTA4H
		SULT1A1
	lecithin	PLA2G4E
		PLD4
		PLA2G4F
		HADHA
		PLA2G2A
		PLA2G2F
		PTGS2
		PLA2G4A
		SGMS1
		PTGS1
		SGMS2
		PLD3
		PLA2G4C
		PLD1
		PTDSS1
		PITPNB
		PLA2G6
		PLB1
		HADHB
		PLA2G16
		CEPT1
		LPCAT4
		PLD6
		MBOAT2
		TAZ
		ALB
		PLA2G4D
		LPCAT1
		LCAT
		ABCA7
		PLD2
		LPCAT2
		PNPLA8
		PEMT
		PLBD1
		APOA1
		CHPT1
		MAPK1
		PPAPDC2
		ENPP7
	Phenol	RAN
		IGLC2
		ARSD
		ARSE
		ARSK
		ARSF
		INS
		ARSG
		SULT1A2
		GIYD1
		SULT1A1
		ARSJ
		BPNT1
		SNUPN
		PRKACA
		UGT1A1
		UGT1A6
		PTER
		NUF2
		NDC80
		CYP2E1
		PON2
		PON1
		EIF2C2
		XPO1
		NQO1
		IL1A
		MPO
		ENSG00000234733
		FTL
		PRSS3
		PRSS1
		CA3
		CA2
	Brefeldin A	CYTH2
		ARF1
		GBF1
	Choline	CHAT
		BCHE
		ACHE
		SLC5A7
		EKB
		CHKA
		PLA2G4E
		PHOSPHO1
		AGPAT1
		ALDH7A1
		PLD4
		PLA2G4F
		PCYT1B
		GPCPD1
		PLA2G2A
		PLA2G2F
		SLC44A1
		SLC18A3
		SLC44A5
		SLC22A1
		SLC22A2
		PLD3
		PLA2G4C
		PLD1
		PTDSS1
		SLC44A2
		CHDH
		CEPT1
		PLD6
		VAMP2
		PCYT1A
		PLA2G4D
		SLC44A3
		PLD2
		SYT1
		PLBD1
		CHPT1
		RAB3A
		LYZ
		SLC22A3
		SLC22A5
		SLC22A4
	Uracil	UPP2
		UNG
		DPYD
		UPP1
		TDG
		CDA
		UPRT
		PNP
		SLC29A2
		UCKL1
		SMUG1
		TRUB1
		CCNO
		DPYS
		TYMP
		AICDA
		PUS3
	Azelaic Acid	TYR
		AKR1D1
		SRD5A2
		PPARG
		NOTCH1
	Myristic acid	PVR
		TLR4
		ABL1
		GM2A
		INS
		HNF4A
		ALB
		LY96
		TRAPPC3
		PRKACA
		FABP2
		PPP3CA
		GUCA1A
		FKBP1A
		PPP3R1
		GCG
		ACOT7
		APOM
		GPR120
		ACOT4
		ACOT1
		PCSK1
		PPARG
		CALM2
		ACOT2
		ARF1
		PECI
		RCVRN
		MSRA
		PAEP
		ARF6
		PKIA
		NCOA1
		PRKACB
		CYP4Z1
		PPP3R2
		FKBP1C
		PPP3CB
		PPP3CC
		FKBP1B
		BET3L
		NCS1
		HPCAL1
		NCALD
	lauryl alcohol	FAAH
		FAAH2
	vitamin A	RBP4
		RBP2
		RDH16
		ADH6
		RDH11
		PNPLA4
		DHRS3
		PNLIP
		CES1
		LRAT
		DGAT1
		PLB1
		DHRS4
		HSD17B6
		DHRS9
		SDR16C5
		ADH1B
		ADH5
		RETSAT
		RDH12
		ADH4
		CLPS
		BCMO1
		RDH10
		TTR
		RBP1
		CYP26A1
		ADH1A
		ADH7
		RDH8
		PAEP
		RDH14
		CYP1A1
		ALDH1A3
		ALDH1A1
		RHO
		RBP7
		RDH13
		RLBP1
		RBP5
		RDH5
		ALDH1A2
		RBP3
		CREB1
		AKR1B10
		FN1
		CTNNB1
		STRA6
		CASP3
		AKR1B1
		RPE65
		CYP1B1
		IGKV1D-8
		IGKV1-8
	Folinic acid	DHFR
		MTHFR
		FPGS
		TYMS
		SLC19A1
		MTHFS
	folic acid	DHFR
		SLC46A1
		FOLR3
		SLC22A6
		ABCC4
		MTHFR
		ABCC11
		FOLR2
		SLC25A32
		ABCC3
		GGH
		CYP2E1
		ABCG2
		ALDH1L1
		PARP1
		SLC19A1
		FOLR1
		TYMS
Achyranthes bidentata Bl. (Niu Xi)	25S-Inokosterone	NR1H3
		NR1H2
	Diisobutyl phthalate	NR1I3
		NR1I2
	palmitic acid	CES1
		FABP1
		FABP4
		CPT2
		PPT1
		HNF4G
		FABP3
		TRAPPC3
		CYP2C8
		SEC14L2
		FABP5
		ALB
		PMP2
		RHO
		PAEP
		FASN
		G14
		CPT1A
		RXRA
		TXNRD1
		ACADM
		TBL1XR1
		NCOA2
		NFYC
		GCG
		LPAR2
		GCGR
		CHD9
		NPS
		MED13
		NMB
		GRK5
		ARNTL
		ACOT7L
		CDK8
		ADRA1A
		AVP
		GRPR
		CYP1A1
		ADRA1D
		EDN1
		HTR2A
		GNB1
		ACBD7
		ACOT7
		NMS
		GNA14
		TBXA2R
		ABCA1
		MED12
		MED18
		HCRTR1
		TACR2
		CYSLTR1
		LPAR4
		EDN2
		ELOVL1
		OPN4
		NCOA3
		ANKRD1
		PTGDS
		GPR120
		HCRTR2
		PTGFR
		LPAR3
		NTSR1
		ME1
		HMGCS2
		PNLIP
		CCNC
		CDK19
		MED23
		APOA2
		CTGF
		XCL2
		XCL1
		RGS18
		KISS1
		AVPR1B
		G0S2
		AGT
		GNPAT
		TEAD1
		GNRHR2
		SREBF2
		WWTR1
		SIN3A
		TEAD4
		NPSR1
		TRAPPC4
		NCOA6
		LPAR1
		ACSL3
		GIP
		MED24
		NCOR2
		ACSL5
		HRH1
		FAR1
		UGT1A9
		TEAD3
		NFYA
		QRFP
		LPAR6
		MED22
		B2M
		UTS2D
		FPR2
		ACSL4
		NPAS2
		PLCB1
		HIF1A
		LTB4R2
		MED19
		EDN3
		CCK
		QRFPR
		ARHGEF25
		CCKBR
		EDNRB
		GNG2
		PLCB4
		RGS19
		PMCH
		GAST
		CHRM5
		PLB1
		TRAPPC6B
		SP1
		GPR132
		TIAM2
		MED25
		CARM1
		MED16
		GRHL1
		OXTR
		MED14
		UTS2R
		ACOT4
		FHL2
		HMGCS1
		FADS1
		F2R
		TAC1
		NCOA1
		LYPLA1
		GPR4
		EDNRA
		MED29
		ADRBK1
		ACOT1
		CYP4A11
		TEAD2
		XCR1
		P2RY2
		TRHR
		P2RY6
		GPRC6A
		ALAS1
		CLOCK
		CD36
		PCSK1
		NPFFR2
		BDKRB2
		LTB4R
		ADRA1B
		CHRM1
		NMUR1
		P2RY1
		ELOVL6
		PROKR1
		NTSR2
		TACR1
		TRH
		TACR3
		RGL1
		HDAC3
		PTAFR
		CYP7A1
		ANGPTL4
		MED1
		TAC3
		PEX11A
		AVPR1A
		NOS3
		MED30
		ACSL6
		TNFRSF21
		F2RL1
		F2RL2
		CASR
		PROK2
		CCKAR
		MED11
		HCRT
		LTC4S
		PTGER1
		MED27
		MED8
		LDLCQ3
		GNAQ
		MED7
		APP
		MED21
		YAP1
		CYSLTR2
		MED13L
		MCHR2
		ACSL1
		PLCB3
		NPFFR1
		PLIN2
		GNRH1
		HTR2C
		PIK3R1
		AGTR1
		GPR17
		PROK1
		NCOR1
		MED9
		SLC27A2
		GPR65
		NPFF
		GLIPR1
		MLN
		ABCB4
		MED20
		KNG1
		PPARGC1A
		NMU
		AGPS
		PIK3CA
		MED26
		EP300
		MED15
		GNA15
		PIK3R3
		PPARA
		CREBBP
		SMARCD3
		RORA
		PLCB2
		TGS1
		CLPS
		ACSBG1
		MED4
		HTR2B
		NMBR
		ANXA1
		GRP
		MED6
		NTS
		MED10
		CHRM3
		NMUR2
		PRIC285
		ACSBG2
		SLC27A1
		MED17
		MCHR1
		F2RL3
		FFAR1
		FFAR2
		GNRH2
		GHSR
		NFYB
		GPR68
		ACOT2
		APOA1
		RGS2
		KISS1R
		RBP2
		APOA5
		GNRHR
		MED31
		PIK3R2
		SULT2A1
		FDFT1
		MLNR
		TBL1X
		ACOT8
		OXT
		PROKR2
		TRIB3
		BDKRB1
		FAR2
		P2RY10
		GNA11
		UTS2
		TRAPPC6A
		FABP2
		TRBV2
		PTGS2
		TRAPPC1
		DBI
		LALBA
		ABCB1
		CD1D
		TRAPPC2
		TRAPPC5
		RELA
		MAPK8
		MAPK9
		UCP2
		TBC1D1
		MAPK14
		CD1A
		ENSG00000211789
		ENSG00000211785
		ENSG00000211794
		PTGS1
		RAB1A
		RAB1B
		CD1E
	quercetin	HCK
		PIM1
		HIBCH
		STK17B
		ATP5C1
		ATP5A1
		ATP5B
		NT5E
		CYP1B1
		CYP19A1
		DRD4
		ABCC1
		CYP1A1
		SLC16A7
		ALOX12
		SLC16A1
		ABCG2
		MMP9
		AKR1B1
		UGT3A1
		EGFR
		CYP2C8
		ABCC2
		PIK3CG
		SLCO2B1
		ABCB1
		CYP1A2
		AKR1C3
		UGT1A8
		UGT1A7
		UGT1A9
		UGT1A10
		SLC2A1
		GSTP1
		NFE2L2
		DIO2
		CHEK2
		EDN1
		ABCC4
		VEGFA
		JUN
		CHUK
		MCL1
		NR1I3
		PTGS2
		PARP1
		HIST3H3
		PTGS1
		STAT1
		MAPK8
		ACACA
		CTNNB1
		ESR2
		PTK2
		HIF1A
		CYP3A4
		NR1I2
		ABCC5
		CASP9
		TBK1
		BCL2
		GSK3B
		SLC2A2
		SULT1A1
		CASP3
		IL8
		CXCL10
		CKB
		CASP7
		CSF2
		BAX
		GLRA1
		AKT1
		TP53
		DIABLO
		RB1
		CDK2
		IL1B
		TYR
		MAPK3
		RPS6KA5
		CYP2C9
		IL6
		AHR
		APOB
		EIF2AK2
		SULT1E1
		CCL2
		PON1
		PLAT
		NFKBIA
		XBP1
		MAPK1
		SERPIND1
		SIRT1
		CFTR
		CA2
		CDK1
		ALOX5
		HSD17B2
		CA1
		CSNK2A1
		ERN1
		ERN2
		GLO1
		NOX4
		CA7
		CA14
		RNASEL
		CA6
	Furol	HBB
		HBA2
	wogonin	CASP3
		MAPK3
		MAPK1
		PTGS2
	oleanolic acid	AKR1B10
		TOP2A
		TOP1
		CASP8
		CYP1A2
		CYP3A4
		CASP3
		PTPN1
	caprylic acid	ALDH7A1
		ALDH1B1
		ACSL3
		ACSL5
		ALDH9A1
		ALDH3A2
		LIPT1
		ACSL4
		GLTP
		MBOAT4
		PCSK1
		SEC11C
		ACSL6
		ACSL1
		SEC11A
		SPCS3
		SPCS2
		LIAS
		ACSBG1
		ACSBG2
		SPCS1
		SLC22A6
		SLC22A8
		PAEP
		SLC22A11
		IAH1
		LIPT2
	succinic acid	ALDH5A1
		HIF1AN
		EGLN1
		TMLHE
		BBOX1
		ALKBH2
		ALKBH3
		ENSG00000232961
		SDHA
		PPIA
		JMJD6
		KDM2A
		SUCLG1
		ASPH
		ISG15
		SUCLA2
		HIF3A
		KDM2B
		SDHD
		SDHB
		CUL2
		OGDHL
		OXCT2
		PLAU
		KDM4A
		SDHC
		FH
		GLT25D2
		BDH1
		FN1
		ALDH9A1
		VRK2
		HIF1A
		DLST
		P4HA3
		P4HB
		HACL1
		ACOT4
		SHMT1
		LEPREL1
		SLC13A2
		GAK
		GPR162
		F2
		SUCLG2
		EGLN2
		COL3A1
		COL1A2
		BDH2
		LEPRE1
		TCEB1
		PLOD2
		SLC13A3
		ABAT
		SLC27A2
		ACAT1
		EPAS1
		P4HA1
		PHYH
		DHTKD1
		ERP44
		TCEB2
		VHL
		GLT25D1
		EGLN3
		COL10A1
		COL1A1
		PLOD3
		OGDH
		RBX1
		DLD
		OXCT1
		PLOD1
		P4HA2
		PFKFB4
		PREP
		SERPINH1
		SUCNR1
		SLC25A10
		SLC22A8
		HSD17B6
		SLC13A1
		PRSS3
		PRSS1
		PAICS
		PPP2R4
		GBE1
		PREPL
	rutin	AKR1C3
		ADRA2C
		CHRM5
		ADRA2A
		CYP2C8
		CYP2D6
		CYP3A4
		CYP2C9
		IL8
		CXCL10
		MAPK3
		CYP1B1
		AHR
		CCL2
		GSR
		MAPK1
	kaempferol	CYP1B1
		AHR
		CYP1A1
		CYP1A2
		ABCC1
		UGT3A1
		UGT1A8
		UGT1A7
		UGT1A9
		UGT1A10
		SLC2A1
		GSTP1
		DIO2
		H2AFX
		CHUK
		NR1I3
		ESR2
		CYP3A4
[truncated: 576 more rows]
