# Supplementary material for: A Network Pharmacology Approach to Uncover the Pharmacological Mechanism of XuanHuSuo Powder on Osteoarthritis
Source: Evid Based Complement Alternat Med. 2016 Mar 24;2016:3246946. doi: 10.1155/2016/3246946 (PMC4823500; doi:10.1155/2016/3246946)
Supplement: Supplementary file 1 — Table S1 shows the composite compounds of each herb in XHSP. Table S2 shows the compound targets for each herb in XHSP. Table S3 shows the targets of osteoarthritis. Table S4 shows the enrichment analysis of compound target, OA target and compound target/OA target based on Gene Ontology (GO) annotation. Table S5 shows the topological features of major nodes in the compound target-OA target-other human proteins' PPI network. Table S6 shows enrichment analysis of compound target, OA target, compound target/OA target and other human protein based on Gene Ontology (GO) annotation. [file 3246946.f1.zip › Supplementary Materials/Table S3.xlsx]

## Sheet: Sheet1
Table S3 OA targets
NAGLU
ALOX5
NR1H4
IL1B
MMP8
PTGS1
PTGS2
MMP3
ADAMTS4
ADAMTS5
MMP13
IL10
MMP21
MMP14
RENBP
MMP11
WISP1
TRPV1
IKBKB
CHUK
IKBKE
MMP9
MMP2
MMP1
