# Supplementary material for: A Network Pharmacology Approach to Uncover the Pharmacological Mechanism of XuanHuSuo Powder on Osteoarthritis
Source: Evid Based Complement Alternat Med. 2016 Mar 24;2016:3246946. doi: 10.1155/2016/3246946 (PMC4823500; doi:10.1155/2016/3246946)
Supplement: Supplementary file 1 — Table S1 shows the composite compounds of each herb in XHSP. Table S2 shows the compound targets for each herb in XHSP. Table S3 shows the targets of osteoarthritis. Table S4 shows the enrichment analysis of compound target, OA target and compound target/OA target based on Gene Ontology (GO) annotation. Table S5 shows the topological features of major nodes in the compound target-OA target-other human proteins' PPI network. Table S6 shows enrichment analysis of compound target, OA target, compound target/OA target and other human protein based on Gene Ontology (GO) annotation. [file 3246946.f1.zip › Supplementary Materials/Table S4.xlsx]

## Sheet: Sheet1
Table S4 Enrichment analysis of compound target, OA target and compound target/OA target based on Gene Ontology (GO) annotation
Term	Pathway	Count	%	Pvalue	Genes	Fold Enrichment	Bonferroni
GO:0032651	Regulation of interleukin-1β production	3	2.25564	0.0160044	SMAD3, CASP1, F2R	15.2571	1
GO:0034097	Response to cytokine stimulus	10	7.5188	7.04e-08	PRKCA, PTGS2, RELA, JUN, BCL2, CASP8, MMP3, SRC, JUNB, CTNNB1	12.8752	0.000155
GO:0043627	Response to estrogen stimulus	9	6.76692	8.37e-06	PRKCA, MAPK1, CAV1, PTGS2, BCL2, ESR1, IL1B, MMP14, CTNNB1	8.71837	0.0182845
GO:0045428	Regulation of NO biosynthetic process	7	5.26316	1.93e-07	EGFR, AKT1, CAV1, HSP90AA1, EDN1, IL1B, IL10	26.3704	0.000424
GO:0070555	Response to interleukin-1	3	2.25564	0.0116761	PRKCA, RELA, SRC	17.9496	1
