# Supplementary material for: A Network Pharmacology Approach to Uncover the Pharmacological Mechanism of XuanHuSuo Powder on Osteoarthritis
Source: Evid Based Complement Alternat Med. 2016 Mar 24;2016:3246946. doi: 10.1155/2016/3246946 (PMC4823500; doi:10.1155/2016/3246946)
Supplement: Supplementary file 1 — Table S1 shows the composite compounds of each herb in XHSP. Table S2 shows the compound targets for each herb in XHSP. Table S3 shows the targets of osteoarthritis. Table S4 shows the enrichment analysis of compound target, OA target and compound target/OA target based on Gene Ontology (GO) annotation. Table S5 shows the topological features of major nodes in the compound target-OA target-other human proteins' PPI network. Table S6 shows enrichment analysis of compound target, OA target, compound target/OA target and other human protein based on Gene Ontology (GO) annotation. [file 3246946.f1.zip › Supplementary Materials/Table S5.xlsx]

## Sheet: Sheet1
Table S5 Topological features of major nodes
Major nodes	Degree	Node betweenness	Closeness
RELA	124	0.0314257	0.520068
ESR1	66	0.00648585	0.466667
EP300	82	0.0191252	0.502475
SRC	73	0.0145336	0.497956
SUMO1	51	0.00426513	0.467742
PRKDC	33	0.00366619	0.4538
IKBKG	109	0.00806045	0.479905
NFKB1	104	0.01647	0.509197
IL1B	57	0.0155025	0.457895
JUN	80	0.0276222	0.525
MAPK11	48	0.00831736	0.449446
IL23A	51	0.00403229	0.413723
TRAF6	114	0.0158158	0.496333
MAPK14	54	0.00556292	0.481804
FOS	63	0.014807	0.503722
JAK2	84	0.0168151	0.4872
MMP2	85	0.0403763	0.457551
TYK2	69	0.0098844	0.47393
LYN	44	0.00337855	0.469545
IL12B	57	0.00502765	0.419711
MMP14	50	0.0258663	0.469907
MMP9	84	0.0394222	0.450777
MMP1	54	0.0175586	0.417409
CYP4F2	36	0.00674682	0.432221
PTGS2	79	0.0433757	0.473561
CYP2E1	36	0.00664701	0.432221
CYP4F3	36	0.00674682	0.432221
PLA2G16	38	0.00665688	0.432836
PLA2G4A	26	0.00544404	0.438445
CTNNB1	81	0.0187336	0.515228
MAPK1	30	0.00824436	0.449446
COPS5	43	0.00767221	0.487981
TP53	98	0.018515	0.515228
ERBB2	35	0.0100557	0.468101
MAPK3	29	0.00715319	0.445175
UBC	353	0.353853	0.689694
JAK1	65	0.00827589	0.456864
SMAD4	45	0.00349006	0.459276
ENG	41	0.00256314	0.42827
ITGAV	47	0.00783313	0.475039
SDC1	33	0.00413839	0.456864
CBL	75	0.0191038	0.472459
PRKCE	33	0.00611715	0.458584
PRKCB	35	0.005643	0.470998
MAP3K1	58	0.00482975	0.477647
IKBKB	219	0.054614	0.542297
BTRC	57	0.00275613	0.468822
CHUK	215	0.049069	0.540853
PRKCZ	50	0.00261466	0.477647
NFKBIA	84	0.00562146	0.478022
HSP90AA1	78	0.00699534	0.48955
STAT3	76	0.0111656	0.484487
TNFRSF1A	57	0.00330315	0.467742
FASLG	39	0.00456952	0.468101
TGFBR1	63	0.00357917	0.469183
MAP3K7	76	0.00327003	0.473193
RPS27A	69	0.00287098	0.475781
TGFBR2	61	0.00508625	0.469183
HSP90AB1	51	0.00392281	0.478774
UBB	78	0.00506709	0.485259
CSNK1A1	26	0.00415379	0.441624
MYC	65	0.00762852	0.49232
PTPN11	61	0.00693837	0.471727
CD44	43	0.00814569	0.475781
ITGA5	40	0.00538315	0.464886
COL4A3	30	0.00406655	0.448124
SDC4	30	0.00428849	0.451111
TGFB1	40	0.00709475	0.474299
ITGB2	25	0.0052662	0.46347
IGF1	31	0.0026085	0.411209
ITGB1	60	0.0151917	0.47393
SDC2	25	0.00382159	0.465241
