# Supplementary material for: A Network Pharmacology Approach to Uncover the Pharmacological Mechanism of XuanHuSuo Powder on Osteoarthritis
Source: Evid Based Complement Alternat Med. 2016 Mar 24;2016:3246946. doi: 10.1155/2016/3246946 (PMC4823500; doi:10.1155/2016/3246946)
Supplement: Supplementary file 1 — Table S1 shows the composite compounds of each herb in XHSP. Table S2 shows the compound targets for each herb in XHSP. Table S3 shows the targets of osteoarthritis. Table S4 shows the enrichment analysis of compound target, OA target and compound target/OA target based on Gene Ontology (GO) annotation. Table S5 shows the topological features of major nodes in the compound target-OA target-other human proteins' PPI network. Table S6 shows enrichment analysis of compound target, OA target, compound target/OA target and other human protein based on Gene Ontology (GO) annotation. [file 3246946.f1.zip › Supplementary Materials/Table S6.xlsx]

## Sheet: Sheet1
Table S6 Enrichment analysis of compound target, OA target, compound target/OA target and other human protein based on Gene Ontology (GO) annotation
Term	Pathway	Count	%	PValue	Genes	Fold Enrichment	Bonferroni
GO:0006915	Apoptosis	18	25	7.32e-09	COL4A3, TP53, NFKBIA, FASLG, NFKB1, ITGB2, CTNNB1, TNFRSF1A, EP300, JUN, MAP3K1, UBC, IL1B, JAK2, UBB, TRAF6, MYC, RPS27A	5.69707	1.31e-05
GO:0006916	Anti-apoptosis	14	19.4444	3.59e-11	PRKCZ, RELA, TGFBR1, ESR1, IGF1, NFKBIA, NFKB1, UBC, IL1B, UBB, TRAF6, IKBKB, MYC, RPS27A	12.949	6.42e-08
GO:0043627	Response to estrogen stimulus	10	13.8889	3.17e-09	MAPK1, PTGS2, TGFBR1, TGFBR2, ESR1, IL1B, MMP14, STAT3, TGFB1, CTNNB1	18.1462	5.67e-06
GO:0045428	Regulation of NO biosynthetic process	4	5.55556	0.000355	HSP90AB1, HSP90AA1, IL1B, JAK2	28.2274	0.470204
GO:0050727	Regulation of inflammatory response	4	5.55556	0.0071225	TNFRSF1A, PLA2G4A, PTGS2, JAK2	10.0282	0.999997
